# Supplementary material for: Applications of Probe Capture Enrichment Next Generation Sequencing for Whole Mitochondrial Genome and 426 Nuclear SNPs for Forensically Challenging Samples
Source: PubMed Central journal article supplement (PMC5793200; doi:10.3390/genes9010049), 2018-01-22
Supplement: genes-09-00049-s001.pdf [file genes-09-00049-s001.pdf]

**Supplement A: Information Corresponding to SNP Number**

The information for SNPs corresponding to SNP numbers in x axes of Figure 3 and 5 of the manuscript are listed below. SNP number 1 – 426 correspond to Figure 3 and 1 – 347 correspond to Figure 5.

| <b>SNP Number</b> | <b>Chromosome Number</b> | <b>Chromosome Coordinates</b> | <b>RS Number</b> | <b>SNP Category/Type</b> |
|-------------------|--------------------------|-------------------------------|------------------|--------------------------|
| 1                 | 1                        | 3743132                       | rs4648344        | Microhaplotype 1         |
| 2                 | 1                        | 3743319                       | rs6663840        | Microhaplotype 1         |
| 3                 | 1                        | 4367323                       | rs1490413        | Identity Informative     |
| 4                 | 1                        | 14155402                      | rs7520386        | Identity Informative     |
| 5                 | 1                        | 15118240                      | rs1721827        | Tetra-allelic            |
| 6                 | 1                        | 105717631                     | rs4847034        | Identity Informative     |
| 7                 | 1                        | 118165691                     | rs1630312        | Tri-allelic              |
| 8                 | 1                        | 151122489                     | rs7554936        | Ancestry Informative     |
| 9                 | 1                        | 159174683                     | rs2814778        | Ancestry Informative     |
| 10                | 1                        | 159684665                     | rs3091244        | Tri-allelic              |
| 11                | 1                        | 160786670                     | rs560681         | Identity Informative     |
| 12                | 1                        | 181188091                     | rs4652604        | Tetra-allelic            |
| 13                | 1                        | 208441488                     | rs1612734        | Tetra-allelic            |
| 14                | 1                        | 214634428                     | rs4528199        | Microhaplotype 2         |
| 15                | 1                        | 214634445                     | rs6604596        | Microhaplotype 2         |
| 16                | 1                        | 217236358                     | rs951416         | Tri-allelic              |
| 17                | 1                        | 230820578                     | rs2296796        | Microhaplotype 3         |
| 18                | 1                        | 230820605                     | rs2296797        | Microhaplotype 3         |
| 19                | 1                        | 230820630                     | rs2296798        | Microhaplotype 3         |
| 20                | 1                        | 233448413                     | rs1294331        | Identity Informative     |
| 21                | 1                        | 238439308                     | rs10495407       | Identity Informative     |
| 22                | 1                        | 239881926                     | rs891700         | Identity Informative     |
| 23                | 1                        | 242806797                     | rs1413212        | Identity Informative     |
| 24                | 2                        | 114974                        | rs876724         | Identity Informative     |
| 25                | 2                        | 7968275                       | rs798443         | Ancestry Informative     |

|    |   |           |            |                      |
|----|---|-----------|------------|----------------------|
| 26 | 2 | 10085722  | rs1109037  | Identity Informative |
| 27 | 2 | 17362568  | rs1876482  | Ancestry Informative |
| 28 | 2 | 17901485  | rs1834619  | Ancestry Informative |
| 29 | 2 | 109513601 | rs3827760  | Ancestry Informative |
| 30 | 2 | 109579738 | rs260690   | Ancestry Informative |
| 31 | 2 | 109586313 | rs260694   | Microhaplotype 4     |
| 32 | 2 | 109586371 | rs11123719 | Microhaplotype 4     |
| 33 | 2 | 109586437 | rs11691107 | Microhaplotype 4     |
| 34 | 2 | 124109213 | rs993934   | Identity Informative |
| 35 | 2 | 136707982 | rs6754311  | Ancestry Informative |
| 36 | 2 | 145694454 | rs727241   | Tri-allelic          |
| 37 | 2 | 149954097 | rs2170607  | Microhaplotype 5     |
| 38 | 2 | 149954253 | rs10497052 | Microhaplotype 5     |
| 39 | 2 | 158667217 | rs10497191 | Ancestry Informative |
| 40 | 2 | 177526156 | rs2594948  | Tetra-allelic        |
| 41 | 2 | 182413259 | rs12997453 | Identity Informative |
| 42 | 2 | 211456637 | rs1047883  | Tri-allelic          |
| 43 | 2 | 239563579 | rs907100   | Identity Informative |
| 44 | 3 | 961782    | rs1357617  | Identity Informative |
| 45 | 3 | 4955595   | rs7632479  | Tetra-allelic        |
| 46 | 3 | 32417644  | rs4364205  | Identity Informative |
| 47 | 3 | 46352355  | rs4513489  | Microhaplotype 6     |
| 48 | 3 | 46352384  | rs6441961  | Microhaplotype 6     |
| 49 | 3 | 46556835  | rs6808142  | Microhaplotype 7     |
| 50 | 3 | 46556948  | rs17030627 | Microhaplotype 7     |
| 51 | 3 | 59488340  | rs9866013  | Identity Informative |
| 52 | 3 | 113804979 | rs1872575  | Identity Informative |
| 53 | 3 | 113890789 | rs3732783  | Microhaplotype 8     |
| 54 | 3 | 113890815 | rs6280     | Microhaplotype 8     |
| 55 | 3 | 118272399 | rs7610981  | Tetra-allelic        |
| 56 | 3 | 121459589 | rs12498138 | Ancestry Informative |

|    |   |           |            |                      |
|----|---|-----------|------------|----------------------|
| 57 | 3 | 133341989 | rs35528968 | Tri-allelic          |
| 58 | 3 | 190806108 | rs1355366  | Identity Informative |
| 59 | 3 | 193207380 | rs6444724  | Identity Informative |
| 60 | 4 | 10969059  | rs2046361  | Identity Informative |
| 61 | 4 | 38803255  | rs4540055  | Tri-allelic          |
| 62 | 4 | 38815502  | rs4833103  | Ancestry Informative |
| 63 | 4 | 46329655  | rs279844   | Identity Informative |
| 64 | 4 | 67786535  | rs13145525 | Tetra-allelic        |
| 65 | 4 | 76425896  | rs13134862 | Identity Informative |
| 66 | 4 | 90673770  | rs356167   | Tri-allelic          |
| 67 | 4 | 100239319 | rs1229984  | Ancestry Informative |
| 68 | 4 | 100244319 | rs3811801  | Ancestry Informative |
| 69 | 4 | 100304166 | rs2584457  | Microhaplotype 9     |
| 70 | 4 | 100304248 | rs12648443 | Microhaplotype 9     |
| 71 | 4 | 100313996 | rs2851017  | Microhaplotype 10    |
| 72 | 4 | 100314062 | rs2032350  | Microhaplotype 10    |
| 73 | 4 | 100321443 | rs4699748  | Microhaplotype 11    |
| 74 | 4 | 100321573 | rs2584461  | Microhaplotype 11    |
| 75 | 4 | 100321595 | rs1442492  | Microhaplotype 11    |
| 76 | 4 | 105375423 | rs7657799  | Ancestry Informative |
| 77 | 4 | 157489906 | rs1554472  | Identity Informative |
| 78 | 4 | 169663615 | rs6811238  | Identity Informative |
| 79 | 4 | 187538133 | rs1280100  | Microhaplotype 12    |
| 80 | 4 | 187538330 | rs1280099  | Microhaplotype 12    |
| 81 | 4 | 190318080 | rs1979255  | Identity Informative |
| 82 | 5 | 2879395   | rs717302   | Identity Informative |
| 83 | 5 | 6845017   | rs870348   | Microhaplotype 13    |
| 84 | 5 | 6845035   | rs870347   | Microhaplotype 13    |
| 85 | 5 | 9619905   | rs41461    | Microhaplotype 14    |
| 86 | 5 | 9619936   | rs41462    | Microhaplotype 14    |
| 87 | 5 | 17374898  | rs159606   | Identity Informative |

|     |   |           |            |                            |
|-----|---|-----------|------------|----------------------------|
| 88  | 5 | 33951693  | rs16891982 | Phenotypically Informative |
| 89  | 5 | 33958959  | rs28777    | Phenotypically Informative |
| 90  | 5 | 120326716 | rs6595279  | Tetra-allelic              |
| 91  | 5 | 136661237 | rs13182883 | Identity Informative       |
| 92  | 5 | 155730681 | rs6870979  | Tetra-allelic              |
| 93  | 5 | 159487953 | rs7704770  | Identity Informative       |
| 94  | 5 | 169735920 | rs315791   | Identity Informative       |
| 95  | 5 | 174778678 | rs251934   | Identity Informative       |
| 96  | 5 | 178260093 | rs6898532  | Tetra-allelic              |
| 97  | 5 | 178690725 | rs338882   | Identity Informative       |
| 98  | 5 | 179696997 | rs9329104  | Tri-allelic                |
| 99  | 6 | 396321    | rs12203592 | Phenotypically Informative |
| 100 | 6 | 457748    | rs4959270  | Phenotypically Informative |
| 101 | 6 | 1135939   | rs1029047  | Identity Informative       |
| 102 | 6 | 12059954  | rs13218440 | Identity Informative       |
| 103 | 6 | 16399647  | rs4565296  | Microhaplotype 15          |
| 104 | 6 | 16399680  | rs4431439  | Microhaplotype 15          |
| 105 | 6 | 16399721  | rs179939   | Microhaplotype 15          |
| 106 | 6 | 37554467  | rs1738442  | Tetra-allelic              |
| 107 | 6 | 55155704  | rs2811231  | Identity Informative       |
| 108 | 6 | 94537255  | rs1336071  | Identity Informative       |
| 109 | 6 | 120560694 | rs1478829  | Identity Informative       |
| 110 | 6 | 123894978 | rs1358856  | Identity Informative       |
| 111 | 6 | 127463376 | rs2503107  | Identity Informative       |
| 112 | 6 | 148761456 | rs2272998  | Identity Informative       |
| 113 | 6 | 152697706 | rs214955   | Identity Informative       |
| 114 | 6 | 165045334 | rs727811   | Identity Informative       |
| 115 | 7 | 4310365   | rs6955448  | Identity Informative       |
| 116 | 7 | 4457003   | rs917118   | Identity Informative       |
| 117 | 7 | 13894276  | rs1019029  | Identity Informative       |
| 118 | 7 | 87160618  | rs2032582  | Tri-allelic                |

|     |   |           |            |                            |
|-----|---|-----------|------------|----------------------------|
| 119 | 7 | 90518278  | rs192655   | Ancestry Informative       |
| 120 | 7 | 96733972  | rs17168174 | Microhaplotype 16          |
| 121 | 7 | 96734057  | rs10246622 | Microhaplotype 16          |
| 122 | 7 | 137029838 | rs321198   | Identity Informative       |
| 123 | 7 | 155990813 | rs737681   | Identity Informative       |
| 124 | 8 | 1375610   | rs763869   | Identity Informative       |
| 125 | 8 | 11595829  | rs1390950  | Microhaplotype 17          |
| 126 | 8 | 11595969  | rs2898295  | Microhaplotype 17          |
| 127 | 8 | 16858884  | rs4532634  | Tri-allelic                |
| 128 | 8 | 17747876  | rs433342   | Tri-allelic                |
| 129 | 8 | 28172586  | rs917115   | Ancestry Informative       |
| 130 | 8 | 28411072  | rs10092491 | Identity Informative       |
| 131 | 8 | 73352424  | rs348146   | Tetra-allelic              |
| 132 | 8 | 110602317 | rs6990312  | Ancestry Informative       |
| 133 | 8 | 122124302 | rs2196051  | Ancestry Informative       |
| 134 | 8 | 127582924 | rs4332095  | Tetra-allelic              |
| 135 | 8 | 136839229 | rs4288409  | Identity Informative       |
| 136 | 8 | 144656754 | rs4606077  | Identity Informative       |
| 137 | 8 | 145639681 | rs1871534  | Ancestry Informative       |
| 138 | 9 | 1823774   | rs1015250  | Identity Informative       |
| 139 | 9 | 2032845   | rs1112534  | Tri-allelic                |
| 140 | 9 | 12672275  | rs1408800  | Microhaplotype 18          |
| 141 | 9 | 12672320  | rs1408801  | Microhaplotype 18          |
| 142 | 9 | 12709305  | rs683      | Phenotypically Informative |
| 143 | 9 | 14747133  | rs2270529  | Identity Informative       |
| 144 | 9 | 27985938  | rs7041158  | Identity Informative       |
| 145 | 9 | 110085992 | rs3818367  | Tri-allelic                |
| 146 | 9 | 126881448 | rs1463729  | Identity Informative       |
| 147 | 9 | 127267689 | rs3814134  | Ancestry Informative       |
| 148 | 9 | 128968063 | rs1360288  | Identity Informative       |
| 149 | 9 | 137417115 | rs3118582  | Microhaplotype 19          |

|     |    |           |            |                                        |
|-----|----|-----------|------------|----------------------------------------|
| 150 | 9  | 137417308 | rs10776839 | Identity Informative/Microhaplotype 19 |
| 151 | 10 | 2406631   | rs826472   | Identity Informative                   |
| 152 | 10 | 3374178   | rs735155   | Identity Informative                   |
| 153 | 10 | 15600703  | rs9333212  | Tri-allelic                            |
| 154 | 10 | 17193346  | rs3780962  | Identity Informative                   |
| 155 | 10 | 54530788  | rs17287498 | Tri-allelic                            |
| 156 | 10 | 88425555  | rs2803554  | Tri-allelic                            |
| 157 | 10 | 94921065  | rs4918664  | Ancestry Informative                   |
| 158 | 10 | 97172595  | rs1410059  | Identity Informative                   |
| 159 | 10 | 118506899 | rs740598   | Identity Informative                   |
| 160 | 10 | 132698419 | rs964681   | Identity Informative                   |
| 161 | 11 | 2168375   | rs11042874 | Tri-allelic                            |
| 162 | 11 | 5098714   | rs10768550 | Identity Informative                   |
| 163 | 11 | 5099393   | rs10500617 | Identity Informative                   |
| 164 | 11 | 5109946   | rs10500616 | Microhaplotype 20                      |
| 165 | 11 | 5110068   | rs2499936  | Microhaplotype 20                      |
| 166 | 11 | 5709028   | rs1498553  | Identity Informative                   |
| 167 | 11 | 11096221  | rs901398   | Identity Informative                   |
| 168 | 11 | 32424389  | rs5030240  | Tri-allelic                            |
| 169 | 11 | 61597212  | rs174570   | Ancestry Informative                   |
| 170 | 11 | 88911696  | rs1042602  | Phenotypically Informative             |
| 171 | 11 | 89011046  | rs1393350  | Phenotypically Informative             |
| 172 | 11 | 105912984 | rs6591147  | Identity Informative                   |
| 173 | 11 | 113111501 | rs2303377  | Microhaplotype 21                      |
| 174 | 11 | 113111665 | rs2303378  | Microhaplotype 21                      |
| 175 | 11 | 113211329 | rs2288159  | Microhaplotype 22                      |
| 176 | 11 | 113211370 | rs10891537 | Microhaplotype 22                      |
| 177 | 11 | 113264470 | rs4938013  | Microhaplotype 23                      |
| 178 | 11 | 113264511 | rs11214596 | Microhaplotype 23                      |
| 179 | 11 | 113283459 | rs6277     | Microhaplotype 24                      |
| 180 | 11 | 113283477 | rs6275     | Microhaplotype 24                      |

|     |    |           |            |                            |
|-----|----|-----------|------------|----------------------------|
| 181 | 11 | 113289182 | rs1079727  | Microhaplotype 25          |
| 182 | 11 | 113289298 | rs2002453  | Microhaplotype 25          |
| 183 | 11 | 113296286 | rs1079597  | Ancestry Informative       |
| 184 | 11 | 115207176 | rs10488710 | Identity Informative       |
| 185 | 11 | 122195989 | rs590162   | Identity Informative       |
| 186 | 11 | 134667546 | rs2076848  | Identity Informative       |
| 187 | 12 | 888320    | rs2107612  | Identity Informative       |
| 188 | 12 | 6909442   | rs2255301  | Identity Informative       |
| 189 | 12 | 6945914   | rs2269355  | Identity Informative       |
| 190 | 12 | 40863052  | rs2920816  | Identity Informative       |
| 191 | 12 | 80014907  | rs2307223  | Tri-allelic                |
| 192 | 12 | 89328335  | rs12821256 | Phenotypically Informative |
| 193 | 12 | 103260634 | rs2133298  | Microhaplotype 26          |
| 194 | 12 | 103260819 | rs3817446  | Microhaplotype 26          |
| 195 | 12 | 106328254 | rs2111980  | Identity Informative       |
| 196 | 12 | 112211833 | rs2238151  | Ancestry Informative       |
| 197 | 12 | 118889488 | rs1503767  | Microhaplotype 27          |
| 198 | 12 | 118889559 | rs11068953 | Microhaplotype 27          |
| 199 | 12 | 130761696 | rs10773760 | Identity Informative       |
| 200 | 13 | 20901724  | rs1335873  | Identity Informative       |
| 201 | 13 | 22374700  | rs1886510  | Identity Informative       |
| 202 | 13 | 24530134  | rs2765117  | Tetra-allelic              |
| 203 | 13 | 41715282  | rs1572018  | Ancestry Informative       |
| 204 | 13 | 42579985  | rs2166624  | Ancestry Informative       |
| 205 | 13 | 49070512  | rs7326934  | Ancestry Informative       |
| 206 | 13 | 50887560  | rs806301   | Microhaplotype 28          |
| 207 | 13 | 50887725  | rs2066700  | Microhaplotype 28          |
| 208 | 13 | 84456735  | rs9546538  | Identity Informative       |
| 209 | 13 | 91171678  | rs1929060  | Tetra-allelic              |
| 210 | 13 | 100038233 | rs1058083  | Identity Informative       |
| 211 | 13 | 106938411 | rs354439   | Identity Informative       |

|     |    |           |            |                                                 |
|-----|----|-----------|------------|-------------------------------------------------|
| 212 | 13 | 111827167 | rs9522149  | Ancestry Informative                            |
| 213 | 14 | 21367444  | rs1008686  | Tri-allelic                                     |
| 214 | 14 | 25850832  | rs1454361  | Identity Informative                            |
| 215 | 14 | 46924415  | rs28674745 | Tetra-allelic                                   |
| 216 | 14 | 53216723  | rs722290   | Identity Informative                            |
| 217 | 14 | 74250557  | rs12717560 | Microhaplotype 29                               |
| 218 | 14 | 74250715  | rs12878166 | Microhaplotype 29                               |
| 219 | 14 | 92773663  | rs12896399 | Phenotypically Informative                      |
| 220 | 14 | 92801203  | rs2402130  | Phenotypically Informative                      |
| 221 | 14 | 99375321  | rs200354   | Ancestry Informative                            |
| 222 | 14 | 104769149 | rs4530059  | Identity Informative                            |
| 223 | 15 | 24571796  | rs2016276  | Identity Informative                            |
| 224 | 15 | 28187772  | rs1545397  | Phenotypically Informative                      |
| 225 | 15 | 28197037  | rs1800414  | Ancestry Informative                            |
| 226 | 15 | 28230318  | rs1800407  | Phenotypically Informative                      |
| 227 | 15 | 28365618  | rs12913832 | Ancestry Informative/Phenotypically Informative |
| 228 | 15 | 39313402  | rs1821380  | Identity Informative                            |
| 229 | 15 | 39842174  | rs8024606  | Tetra-allelic                                   |
| 230 | 15 | 45152371  | rs735480   | Ancestry Informative                            |
| 231 | 15 | 48426484  | rs1426654  | Ancestry Informative                            |
| 232 | 15 | 53616909  | rs8037429  | Identity Informative                            |
| 233 | 15 | 55210705  | rs1528460  | Identity Informative                            |
| 234 | 15 | 101934168 | rs58329356 | Tetra-allelic                                   |
| 235 | 16 | 5606197   | rs729172   | Identity Informative                            |
| 236 | 16 | 5868700   | rs2342747  | Identity Informative                            |
| 237 | 16 | 7520254   | rs7205345  | Identity Informative                            |
| 238 | 16 | 55540756  | rs11865501 | Tri-allelic                                     |
| 239 | 16 | 56926828  | rs2278489  | Tri-allelic                                     |
| 240 | 16 | 78017051  | rs430046   | Identity Informative                            |
| 241 | 16 | 80106361  | rs1382387  | Identity Informative                            |
| 242 | 16 | 88241056  | rs67406039 | Tetra-allelic                                   |



|     |    |          |                       |                            |
|-----|----|----------|-----------------------|----------------------------|
| 243 | 16 | 89730827 | rs459920              | Ancestry Informative       |
| 244 | 16 | 89985844 | rs1805005             | Phenotypically Informative |
| 245 | 16 | 89985918 | rs1805006             | Phenotypically Informative |
| 246 | 16 | 89985940 | rs2228479             | Phenotypically Informative |
| 247 | 16 | 89986091 | rs11547464            | Phenotypically Informative |
| 248 | 16 | 89986117 | rs1805007             | Phenotypically Informative |
| 249 | 16 | 89986130 | rs1110400             | Phenotypically Informative |
| 250 | 16 | 89986144 | rs1805008             | Phenotypically Informative |
| 251 | 16 | 89986154 | rs885479              | Phenotypically Informative |
| 252 | 17 | 2919393  | rs9905977             | Identity Informative       |
| 253 | 17 | 5706623  | rs740910              | Identity Informative       |
| 254 | 17 | 6811529  | rs4796362             | Identity Informative       |
| 255 | 17 | 7554536  | rs1050528             | Tri-allelic                |
| 256 | 17 | 40658533 | rs4411548             | Ancestry Informative       |
| 257 | 17 | 41056245 | rs2593595             | Ancestry Informative       |
| 258 | 17 | 41286822 | rs2175957             | Identity Informative       |
| 259 | 17 | 41341984 | rs8070085             | Identity Informative       |
| 260 | 17 | 41691526 | rs1004357             | Identity Informative       |
| 261 | 17 | 43472321 | rs1059504/rs114063948 | Microhaplotype 30          |
| 262 | 17 | 43472507 | rs8327                | Microhaplotype 30          |
| 263 | 17 | 45695832 | rs3760370             | Microhaplotype 31          |
| 264 | 17 | 45695914 | rs3760371             | Microhaplotype 31          |
| 265 | 17 | 46510697 | rs1027895             | Identity Informative       |
| 266 | 17 | 47287067 | rs2233362             | Microhaplotype 32          |
| 267 | 17 | 47287109 | rs634370              | Microhaplotype 32          |
| 268 | 17 | 48112927 | rs6504633             | Tetra-allelic              |
| 269 | 17 | 62987151 | rs11652805            | Ancestry Informative       |
| 270 | 17 | 68849814 | rs7218712             | Tetra-allelic              |
| 271 | 17 | 80461935 | rs8078417             | Identity Informative       |
| 272 | 17 | 80526139 | rs2291395             | Identity Informative       |
| 273 | 17 | 80531643 | rs4789798             | Identity Informative       |

|     |    |          |            |                            |
|-----|----|----------|------------|----------------------------|
| 274 | 17 | 80715702 | rs689512   | Identity Informative       |
| 275 | 17 | 80739859 | rs3744163  | Identity Informative       |
| 276 | 17 | 80765788 | rs2292972  | Identity Informative       |
| 277 | 18 | 1127986  | rs1493232  | Identity Informative       |
| 278 | 18 | 9749879  | rs9951171  | Identity Informative       |
| 279 | 18 | 22739001 | rs7229946  | Identity Informative       |
| 280 | 18 | 29311034 | rs985492   | Identity Informative       |
| 281 | 18 | 35277622 | rs2042762  | Ancestry Informative       |
| 282 | 18 | 47371014 | rs521861   | Identity Informative       |
| 283 | 18 | 55225777 | rs1736442  | Identity Informative       |
| 284 | 18 | 67867663 | rs4891825  | Ancestry Informative       |
| 285 | 18 | 75432386 | rs1024116  | Identity Informative       |
| 286 | 19 | 4077096  | rs7251928  | Ancestry Informative       |
| 287 | 19 | 4852137  | rs1055919  | Microhaplotype 33          |
| 288 | 19 | 4852337  | rs2271057  | Microhaplotype 33          |
| 289 | 19 | 39559807 | rs576261   | Identity Informative       |
| 290 | 19 | 44163746 | rs385780   | Tri-allelic                |
| 291 | 20 | 4447483  | rs1031825  | Identity Informative       |
| 292 | 20 | 12632017 | rs12625560 | Tetra-allelic              |
| 293 | 20 | 15124933 | rs445251   | Identity Informative       |
| 294 | 20 | 16241416 | rs12480506 | Identity Informative       |
| 295 | 20 | 23017082 | rs2567608  | Identity Informative       |
| 296 | 20 | 29550804 | rs12481195 | Tetra-allelic              |
| 297 | 20 | 32785212 | rs6119471  | Phenotypically Informative |
| 298 | 20 | 33218090 | rs2378249  | Phenotypically Informative |
| 299 | 20 | 33761837 | rs2069945  | Tri-allelic                |
| 300 | 20 | 39487110 | rs1005533  | Identity Informative       |
| 301 | 20 | 51296162 | rs1523537  | Identity Informative       |
| 302 | 20 | 59703918 | rs10854214 | Microhaplotype 34          |
| 303 | 20 | 59704014 | rs10854215 | Microhaplotype 34          |
| 304 | 21 | 16685598 | rs722098   | Identity Informative       |

|     |    |          |            |                      |
|-----|----|----------|------------|----------------------|
| 305 | 21 | 28023370 | rs464663   | Identity Informative |
| 306 | 21 | 28608163 | rs2830795  | Identity Informative |
| 307 | 21 | 29679687 | rs2831700  | Identity Informative |
| 308 | 21 | 33582722 | rs2833736  | Identity Informative |
| 309 | 21 | 34392683 | rs35474228 | Tetra-allelic        |
| 310 | 21 | 36590104 | rs471010   | Tri-allelic          |
| 311 | 21 | 42415929 | rs914165   | Identity Informative |
| 312 | 21 | 43606997 | rs221956   | Identity Informative |
| 313 | 22 | 19920359 | rs9606186  | Identity Informative |
| 314 | 22 | 19920646 | rs5746846  | Identity Informative |
| 315 | 22 | 19951207 | rs4818     | Microhaplotype 35    |
| 316 | 22 | 19951271 | rs4680     | Microhaplotype 35    |
| 317 | 22 | 23802171 | rs2073383  | Identity Informative |
| 318 | 22 | 27816784 | rs733164   | Identity Informative |
| 319 | 22 | 33559508 | rs987640   | Identity Informative |
| 320 | 22 | 41697338 | rs2024566  | Ancestry Informative |
| 321 | 22 | 46656247 | rs34741930 | Tri-allelic          |
| 322 | 22 | 47836412 | rs2040411  | Identity Informative |
| 323 | 22 | 48362290 | rs1028528  | Identity Informative |
| 324 | X  | 4066743  | rs2056688  | X Chromosomal        |
| 325 | X  | 5616964  | rs2128519  | X Chromosomal        |
| 326 | X  | 11882557 | rs1534285  | X Chromosomal        |
| 327 | X  | 18151389 | rs763056   | X Chromosomal        |
| 328 | X  | 25779585 | rs1373592  | X Chromosomal        |
| 329 | X  | 34091679 | rs993010   | X Chromosomal        |
| 330 | X  | 35632777 | rs1557054  | X Chromosomal        |
| 331 | X  | 40871567 | rs1243792  | X Chromosomal        |
| 332 | X  | 42848162 | rs925178   | X Chromosomal        |
| 333 | X  | 47686005 | rs1207480  | X Chromosomal        |
| 334 | X  | 67200648 | rs1936313  | X Chromosomal        |
| 335 | X  | 94465580 | rs1372687  | X Chromosomal        |

|     |   |           |            |               |
|-----|---|-----------|------------|---------------|
| 336 | X | 95114611  | rs1857602  | X Chromosomal |
| 337 | X | 104268001 | rs985425   | X Chromosomal |
| 338 | X | 106598707 | rs933315   | X Chromosomal |
| 339 | X | 116521416 | rs2190288  | X Chromosomal |
| 340 | X | 119826608 | rs1991961  | X Chromosomal |
| 341 | X | 120864696 | rs1931662  | X Chromosomal |
| 342 | X | 126325138 | rs149910   | X Chromosomal |
| 343 | X | 128259481 | rs1573704  | X Chromosomal |
| 344 | X | 139920048 | rs1340718  | X Chromosomal |
| 345 | X | 144091597 | rs1930674  | X Chromosomal |
| 346 | X | 145069663 | rs1339597  | X Chromosomal |
| 347 | X | 151150133 | rs1981452  | X Chromosomal |
| 348 | Y | 2663943   | rs9786608  | Y Chromosomal |
| 349 | Y | 2734854   | rs35284970 | Y Chromosomal |
| 350 | Y | 2828425   | rs2267802  | Y Chromosomal |
| 351 | Y | 3545167   | rs2350606  | Y Chromosomal |
| 352 | Y | 6000464   | rs7067483  | Y Chromosomal |
| 353 | Y | 6965215   | rs16981311 | Y Chromosomal |
| 354 | Y | 7218079   | rs4988808  | Y Chromosomal |
| 355 | Y | 7395806   | rs9786877  | Y Chromosomal |
| 356 | Y | 7568568   | rs16981290 | Y Chromosomal |
| 357 | Y | 7570822   | rs1005041  | Y Chromosomal |
| 358 | Y | 7963031   | rs895530   | Y Chromosomal |
| 359 | Y | 8050994   | rs9786915  | Y Chromosomal |
| 360 | Y | 8602415   | rs16981340 | Y Chromosomal |
| 361 | Y | 8679843   | rs3853054  | Y Chromosomal |
| 362 | Y | 8685083   | rs4141564  | Y Chromosomal |
| 363 | Y | 9866740   | rs16980711 | Y Chromosomal |
| 364 | Y | 14197867  | rs4141886  | Y Chromosomal |
| 365 | Y | 14199284  | rs16980478 | Y Chromosomal |
| 366 | Y | 14432928  | rs2740980  | Y Chromosomal |

|     |   |          |            |               |
|-----|---|----------|------------|---------------|
| 367 | Y | 14497207 | rs60115999 | Y Chromosomal |
| 368 | Y | 14664631 | rs9786634  | Y Chromosomal |
| 369 | Y | 14790163 | rs3913     | Y Chromosomal |
| 370 | Y | 14804077 | rs9786191  | Y Chromosomal |
| 371 | Y | 14847792 | rs2032597  | Y Chromosomal |
| 372 | Y | 14851554 | rs2032599  | Y Chromosomal |
| 373 | Y | 14898163 | rs20320    | Y Chromosomal |
| 374 | Y | 14904859 | rs2032607  | Y Chromosomal |
| 375 | Y | 14954280 | rs2032602  | Y Chromosomal |
| 376 | Y | 15014506 | rs2032676  | Y Chromosomal |
| 377 | Y | 15018582 | rs8179021  | Y Chromosomal |
| 378 | Y | 15020578 | rs9341290  | Y Chromosomal |
| 379 | Y | 15021522 | rs9786025  | Y Chromosomal |
| 380 | Y | 15023364 | rs9341301  | Y Chromosomal |
| 381 | Y | 15027529 | rs2032636  | Y Chromosomal |
| 382 | Y | 15415115 | rs16980601 | Y Chromosomal |
| 383 | Y | 15437564 | rs2032666  | Y Chromosomal |
| 384 | Y | 15469724 | rs9341278  | Y Chromosomal |
| 385 | Y | 15472863 | rs9786043  | Y Chromosomal |
| 386 | Y | 15481372 | rs9341277  | Y Chromosomal |
| 387 | Y | 15508706 | rs2032678  | Y Chromosomal |
| 388 | Y | 15581983 | rs2032658  | Y Chromosomal |
| 389 | Y | 15754313 | rs917759   | Y Chromosomal |
| 390 | Y | 15809326 | rs16980360 | Y Chromosomal |
| 391 | Y | 15935524 | rs7067279  | Y Chromosomal |
| 392 | Y | 16251357 | rs16980586 | Y Chromosomal |
| 393 | Y | 16338537 | rs9786301  | Y Chromosomal |
| 394 | Y | 16846439 | rs9786893  | Y Chromosomal |
| 395 | Y | 17285993 | rs17307398 | Y Chromosomal |
| 396 | Y | 17420017 | rs9786126  | Y Chromosomal |
| 397 | Y | 17470112 | rs9786781  | Y Chromosomal |

|     |   |          |            |               |
|-----|---|----------|------------|---------------|
| 398 | Y | 17508337 | rs17222419 | Y Chromosomal |
| 399 | Y | 17716251 | rs1118473  | Y Chromosomal |
| 400 | Y | 18028661 | rs17307656 | Y Chromosomal |
| 401 | Y | 18656508 | rs9785702  | Y Chromosomal |
| 402 | Y | 18964263 | rs17315758 | Y Chromosomal |
| 403 | Y | 19179335 | rs17315835 | Y Chromosomal |
| 404 | Y | 19267344 | rs17249974 | Y Chromosomal |
| 405 | Y | 19500107 | rs9786357  | Y Chromosomal |
| 406 | Y | 20337461 | rs2032623  | Y Chromosomal |
| 407 | Y | 20366926 | rs2032651  | Y Chromosomal |
| 408 | Y | 21083420 | rs16980577 | Y Chromosomal |
| 409 | Y | 21618583 | rs16980574 | Y Chromosomal |
| 410 | Y | 21722998 | rs3901     | Y Chromosomal |
| 411 | Y | 21733454 | rs3911     | Y Chromosomal |
| 412 | Y | 21751449 | rs34289137 | Y Chromosomal |
| 413 | Y | 21778998 | rs9306841  | Y Chromosomal |
| 414 | Y | 21843090 | rs891407   | Y Chromosomal |
| 415 | Y | 21893881 | rs2032672  | Y Chromosomal |
| 416 | Y | 21894058 | rs2032673  | Y Chromosomal |
| 417 | Y | 21917313 | rs2032652  | Y Chromosomal |
| 418 | Y | 22072340 | rs4116821  | Y Chromosomal |
| 419 | Y | 22094491 | rs3865828  | Y Chromosomal |
| 420 | Y | 22738775 | rs9341308  | Y Chromosomal |
| 421 | Y | 22745051 | rs9341318  | Y Chromosomal |
| 422 | Y | 22749853 | rs13447352 | Y Chromosomal |
| 423 | Y | 22750583 | rs1558843  | Y Chromosomal |
| 424 | Y | 22918577 | rs16980548 | Y Chromosomal |
| 425 | Y | 23035132 | rs9786261  | Y Chromosomal |
| 426 | Y | 23443971 | rs17842518 | Y Chromosomal |
